# Supplementary material for: Deciphering Molecular Factors That Affect Electron Transfer at the Cell Surface of Electroactive Bacteria: The Case of OmcA from Shewanella oneidensis MR-1
Source: MDPI journal article supplement (doi:10.3390/microorganisms11010079), 2022-12-28
Supplement: s1 [file s1]

# Deciphering Molecular Factors That Affect Electron Transfer at the Cell Surface of Electroactive Bacteria: The Case of OmcA from *Shewanella oneidensis* MR-1

Ricardo O. Louro \*, Giovanni Rusconi, Bruno M. Fonseca and Catarina M. Paquete \*

## Supplementary Materials

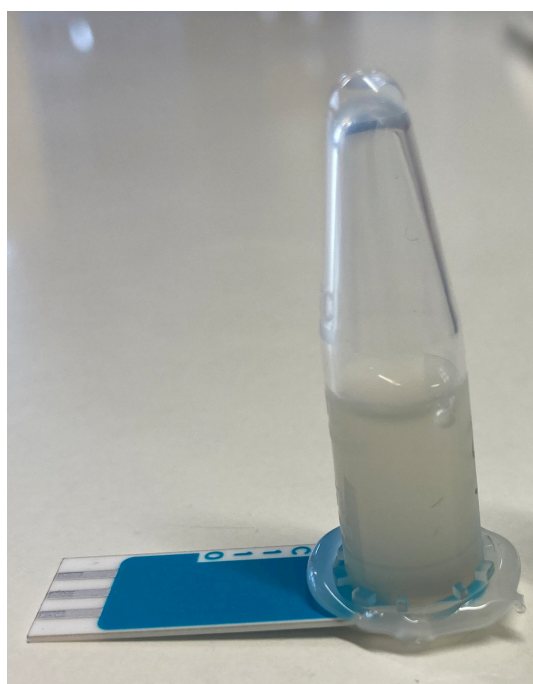

**Figure S1.** The setup used with the SPEs used to evaluate the electroactivity of the *S. oneidensis*  $\Delta$ OmcA  $\Delta$ MtrC cells carrying different OmcA mutants

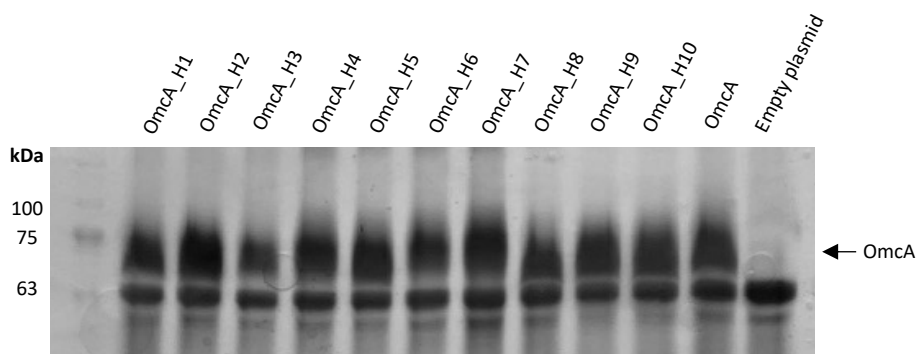

**Figure S2.** SDS-PAGE of lysed *S. oneidensis*  $\Delta$ OmcA  $\Delta$ MtrC cells carrying the different OmcA mutants: SOMR1  $\Delta$ OmcA  $\Delta$ MtrC/pBBR\_OmcA H1-H10, native OmcA: SOMR1  $\Delta$ OmcA  $\Delta$ MtrC/pBBR\_OmcA and the empty plasmid: SOMR1  $\Delta$ OmcA  $\Delta$ MtrC/pBBR. Toward this, 1 ml of cells grown over-night (to approximately the same OD<sub>600 nm</sub>) aerobically in LB at 30 °C at 150 rpm were lysed with Bacterial Cell Lysis Buffer (NZYTech, Portugal), and centrifuged for 20 min at 12 000 xg. The same amount of solubilized protein extract was loaded for each strain in the SDS-PAGE. After electrophoresis, the gel was stained for c-type cytochromes [47].

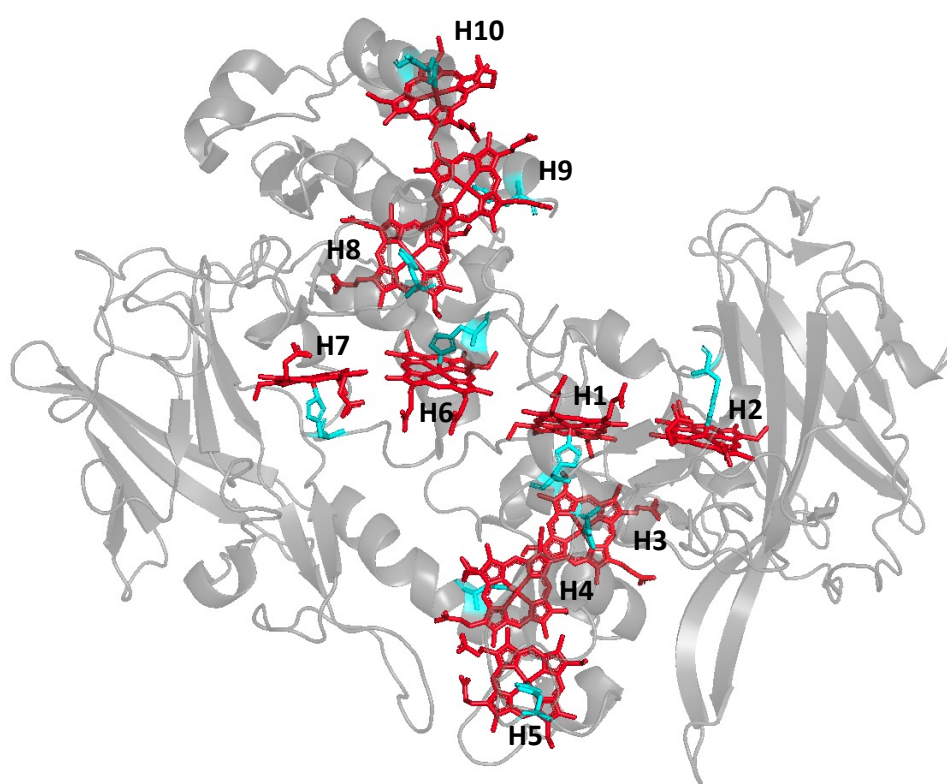

**Figure S3.** Cartoon representation of the three-dimensional structure of OmcA (PDB 4LMH). The distal histidine residue that was mutated in each individual heme is highlighted in cyan, while hemes are colored in red.

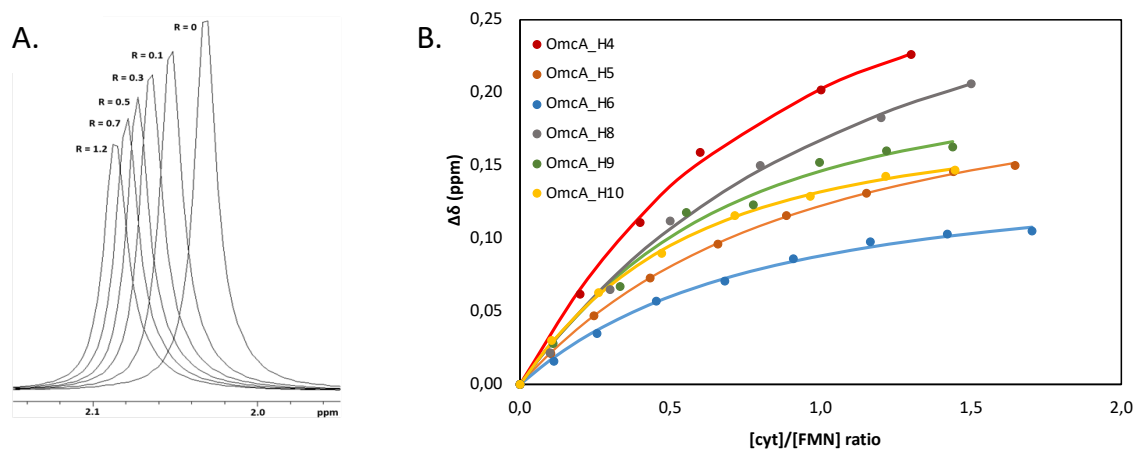

**Figure S4.** A.  $^{31}\text{P}$  1D-NMR spectra of FMN recorded in the presence of increasing amounts of OmcA mutated in heme 10 with R representing the molar ratio of the interaction molecules  $[\text{OmcA}]/[\text{FMN}]$ . B. Binding curves of OmcA mutants OmcA\_H4, OmcA\_H5, OmcA\_H6, OmcA\_H8, OmcA\_H9 and OmcA\_H10 with FMN. The chemical shift perturbation of the signal of the phosphorous nucleus of FMN is plotted as a function of the molar ratio of the interacting molecules ( $[\text{OmcA}]/[\text{FMN}]$ ). For each mutant the best global fitting for the binding model is represented by a solid line.

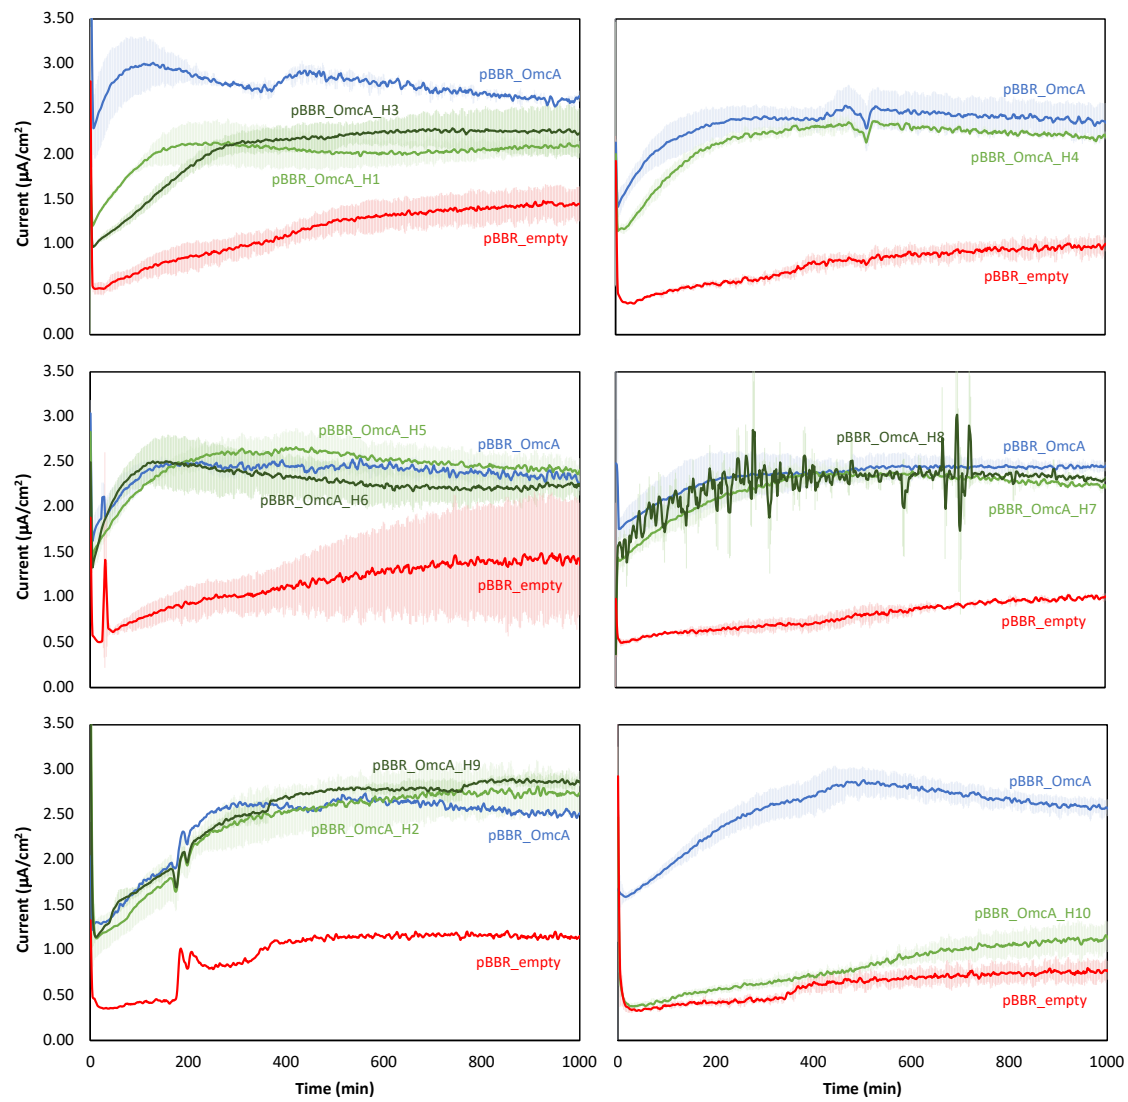

**Figure S5.** Current density produced by *S. oneidensis*  $\Delta$ OmcA  $\Delta$ MtrC cells carrying the different OmcA mutants: SOMR1  $\Delta$ OmcA  $\Delta$ MtrC/pBBR\_OmcA H1-H10 (green line), native OmcA: SOMR1  $\Delta$ OmcA  $\Delta$ MtrC/pBBR\_OmcA (blue line) and the empty plasmid: SOMR1  $\Delta$ OmcA  $\Delta$ MtrC/pBBR (red line). Error bars shown in the same colors represent the standard deviation of the mean from experiments performed at least in triplicate (except for the native OmcA and empty plasmid of the experiment where OmcA\_H2 and OmcA\_H9 were tested, with only one experiment represented).

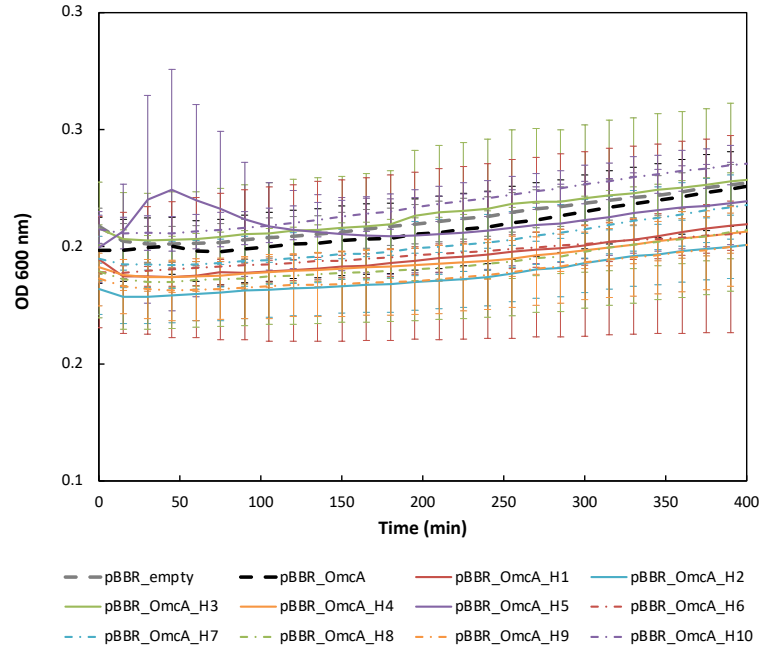

**Figure S6.** Growth profile of *S. oneidensis*  $\Delta$ OmcA  $\Delta$ MtrC carrying different OmcA mutants: SOMR1  $\Delta$ OmcA  $\Delta$ MtrC /pBBR\_OmcA H1-H10, native OmcA: SOMR1  $\Delta$ OmcA  $\Delta$ MtrC/pBBR\_OmcA and the empty plasmid: SOMR1  $\Delta$ OmcA  $\Delta$ MtrC /pBBR\_empty measured at OD<sub>600 nm</sub> when the cells are growing under anaerobic conditions in SBM medium at 30 °C and reducing methyl orange. The error bars represent standard deviations of the measurements.
